# Supplementary material
Source: publisher figshare collection journal article supplement (https://sage.figshare.com/ndownloader/files/12981470)
Supplement: Supplementary file 1 [file 12981470]

## Sheet: Supp. Table 3
Supplementary Table 3: Sub Grouping of Cell Proliferation Related Ontologies
Endothelial Cell Proliferation
blood vessel endothelial cell proliferation involved in sprouting angiogenesis (GO:0002043)
endothelial cell proliferation (GO:0001935)
negative regulation of endothelial cell proliferation (GO:0001937)
positive regulation of endothelial cell proliferation (GO:0001938)
Smooth Muscle Cell Proliferation
negative regulation of smooth muscle cell proliferation (GO:0048662)
negative regulation of vascular smooth muscle cell proliferation (GO:1904706)
Stem Cell Proliferation
hematopoietic stem cell proliferation (GO:0071425)
stem cell proliferation (GO:0072089)
Epithelial Cell Proliferation
positive regulation of epithelial cell proliferation involved in lung morphogenesis (GO:0060501)
Fibroblast Proliferation
positive regulation of fibroblast proliferation (GO:0048146)
Mesenchymal Cell Proliferation
negative regulation of mesenchymal cell proliferation (GO:0072201)
T Cell Proliferation
positive regulation of T cell proliferation (GO:0042102)
General Proliferation Pathways
cell proliferation (GO:0008283)
negative regulation of cell proliferation (GO:0008285)
positive regulation of cell proliferation (GO:0008284)
regulation of cell proliferation (GO:0042127)
Hair Follicle Cell Proliferation
positive regulation of hair follicle cell proliferation (GO:0071338)
Neural Cell Proliferation
negative regulation of neural precursor cell proliferation (GO:2000178)
positive regulation of glial cell proliferation (GO:0060252)
positive regulation of neural precursor cell proliferation (GO:2000179)
Osteoblast Proliferation
positive regulation of osteoblast proliferation (GO:0033690)
regulation of osteoblast proliferation (GO:0033688)
Mammary Gland Cell Proliferation
mammary gland epithelial cell proliferation (GO:0033598)
